# 1 **Costs and economic impacts of expanding marine protected area** 2 **systems to 30%**

3 Working Paper WACC22/2

4  
5 Waldron, Anthony<sup>1,2\*</sup>, Ryan Heneghan<sup>3</sup>, Jeroen Steenbeek<sup>4,5</sup>, Marta Coll<sup>5</sup>, Kim J. N.  
6 Scherrer<sup>6</sup>

7  
8 1. Cambridge Conservation Initiative, David Attenborough Building, Pembroke St, Cambridge UK

9 2. Working Ant Consultancy Cambridge Ltd, Copley Business Park, Babraham, Cambridge, UK

10 3. School of Mathematical Sciences, Queensland University of Technology, Brisbane, Queensland, Australia

11 4. Ecopath International Initiative (EII) Research Association, Barcelona, Spain.

12 5. Institute of Marine Science (ICM-CSIC), Passeig Maritim de la Barceloneta, 37-49. 08003, Barcelona, Spain

13 6. Department of Biological Sciences, University of Bergen, 5020 Bergen, Norway

14 \* Corresponding author: [anthonywaldron@hotmail.com](mailto:anthonywaldron@hotmail.com)

## 15 16 **Abstract**

17 International proposals for marine biodiversity seek to expand marine protected area (MPA)  
18 coverage from 8% to 30%, known as 30x30. Quadrupling MPA coverage implies  
19 considerably higher MPA system costs and governments need early knowledge of these to  
20 inform debate. Ambitious MPA expansion also implies large potential losses or "opportunity  
21 costs" for fishers, putting pressure on governments to compromise and permit some fishing  
22 inside protected areas (a mixed high/low protection system). Crafting a balanced  
23 compromise needs to be informed by model projections of future fisheries outcomes under  
24 different protection regimes, climate change scenarios and behavioural adaptations. Here,  
25 we develop the first models for management costs at national MPA-system scale. We create  
26 scenarios of 30x30 at different compromises around protection strictness. We then examine  
27 how both MPA costs and opportunity costs vary with strictness, by simultaneously applying  
28 our management cost models and two Marine Ecosystem Models. We find that a no-take  
29 (high protection) MPA system could cost just \$2 billion/year for the developing world and ~\$8  
30 billion overall, but would also create opportunity costs several times larger. A compromise  
31 mix of high and medium protection would have much higher MPA costs (e.g. \$4.5 billion for  
32 the developing world) but much lower opportunity costs, to the point of fisheries actually  
33 benefiting in the future. Since lower protection also compromises on biodiversity goals, our  
34 results show the trade-offs that political decisions need to consider beyond COP15. More  
35 generally, the unusually large opportunity costs show how marine contexts generate very  
36 different economic issues from terrestrial ones, by attempting to protect a common pool  
37 resource area that envisages no automatic market compensation for income lost to  
38 conservation.  
39

40 Marine protected areas (MPAs) currently cover 8% of the ocean<sup>1</sup>, barely one quarter of what  
41 is needed to preserve marine biodiversity<sup>2</sup>. In response, Draft Target 3 of the Global  
42 Biodiversity Framework (GBF) has proposed expanding coverage to 30% by 2030<sup>3</sup>,  
43 abbreviated as "30x30". However, there are serious concerns about the potential economic  
44 costs of such ambitious improvements in protection. First, governments can reasonably  
45 assume that a quadrupling MPA systems implies a large increase in the corresponding  
46 management budget, plus a one-off cost for creating so many new MPAs. Second,  
47 increased restrictions (e.g. fishing restrictions) could imply significant losses for marine  
48 livelihoods, economic output and food security.

49  
50 The difficulty is that the size of these costs remains largely unknown, not least because the  
51 30% proposal itself cannot yet include details about where or how it would be implemented  
52 in practice. Governments are therefore being asked to commit to a major policy change  
53 without knowing its cost - an issue we refer to as the "blank cheque" problem. Financial and  
54 economic costs are one of the major points of debate and disagreement at international  
55 environmental summits<sup>4-6</sup>, including the Conferences of Parties (COPs) of the Convention  
56 on Biological Diversity (CBD). In the absence of concrete information, this debate will  
57 revolve around imagined costs and losses, which can cause conflicts that are difficult to  
58 resolve and impede progress on policy. Three fundamental types of (unknown) cost can be  
59 defined. The first two are the direct costs of protected areas (PAs), namely the  
60 "management" cost (the annual cost of managing PAs) and the "establishment" cost (the  
61 cost of creating new PAs)<sup>7-9</sup>. The third type is the "opportunity" cost<sup>10</sup>, defined as the lost  
62 economic output resulting from greater use restrictions in PAs (although there can also be  
63 benefits e.g. from recovering fish stocks or enhanced tourism income in MPAs<sup>11-13</sup>). Most  
64 discussions of cost focus on the direct costs<sup>8,14-16</sup>, which are likely to be those paid by  
65 conservationists or environment ministries.

66  
67 However, we argue that governments are more likely to achieve meaningful debate and  
68 implementation of ambitious CBD goals if they are given information about both types of cost  
69 together. Before all else, natural and social justice demands that environmental decision-  
70 makers consider the impacts of large policy changes on external parties, especially on the  
71 most vulnerable (including, for marine 30x30, the many small-scale fishers or SSFs who  
72 depend on exploiting the ocean to maintain marginal livelihoods<sup>17</sup>). More pragmatically, the  
73 final cost to governments may well include some additional budget to mitigate the negative  
74 impacts of greater protection on industries and communities, and so a focus on direct costs  
75 only is misleading. Even if a commitment is made to 30x30 with such limited information,  
76 implementation of the commitment may be weak or highly conflictive if it is later found that  
77 there are large opportunity costs. The draft GBF already contains language around  
78 permitting exploitative use of PAs that reflects an intuition of such opportunity costs<sup>3</sup>, but the  
79 vagueness of information about what those costs might be can translate into vagueness of  
80 protection, potentially helping neither biodiversity nor human communities in an efficient  
81 way.

82  
83 Here, we estimate the full range of costs for the expansion of marine PAs to 30% coverage.  
84 We first develop three scenarios of 30x30 that reflect different balances between the  
85 priorities of conservation, the fisheries industry, and small scale fishers in particular. We  
86 develop new models that accurately predict the management costs of entire national MPA  
87 systems and apply them to estimate 30x30 management costs, also adding estimates of  
88 establishment costs. Simultaneously, we estimate the opportunity costs of the 30x30 target  
89 to the fisheries sector, under multiple sub-scenarios of future climate change and future  
90 approaches to making fishing effort more sustainable. Finally, we discuss the how marine  
91 conservation costs need to be approached in a fundamentally different way from the more  
92 commonly-studied terrestrial ones.

93  
94 ***Estimating costs of national MPA systems***

95 Existing models of management and opportunity costs are unsatisfactory for resolving the  
96 blank cheque problem in several ways. For management costs, the most widely-used model  
97 is the one developed by Balmford et al.<sup>15</sup> that predicts the cost of individual MPAs based  
98 purely on their size. But if one wishes to apply the Balmford model to a national MPA  
99 system, one first has to make a complex set of assumptions about how big each individual  
100 MPA will be, which is both time-consuming and uncertain<sup>15</sup>. More importantly, the  
101 assumption chosen can change the cost estimate by over 500% (an error that increases with  
102 the coverage desired); for example, Brander et al.<sup>18</sup> applied Balmford's model to the same  
103 question (the cost of global 30% coverage) but derived a set of answers that were generally  
104 larger than those of Balmford et al. by hundreds of percent. The Balmford model also  
105 includes no estimate of central system costs. What is needed is a model that simply predicts  
106 national system costs directly, allowing rapid costing for proposals such as 30x30.  
107

108 To create a costing algorithm for national MPA systems, we took empirical data from where  
109 governments or their agents have reported the "optimal" budget levels for their national MPA  
110 systems (defined as the funding needed for the system to achieve its goals fully), and then  
111 developed a mixed negative binomial regression model that predicts these budget needs  
112 (per hectare) (Methods). We used two different statistical estimation methods and these  
113 identified two possible best fitting models, based on information theoretic approaches  
114 (Methods). The first model (using the adaptive Gauss-Hermite quadrature approximation)  
115 contained terms for the national MPA system size, GDP per capita in the areas adjacent to  
116 the national system, and international tourist arrivals per capita (table 1, Methods). The  
117 second model (using the Laplace approximation) added, to this same set of terms, the ratio  
118 between the mean fisheries catch around the borders of the MPA system and the fisheries  
119 catch. Budget need per hectare went down as system size increased, reflecting well-known  
120 economies of scale<sup>7,8,14,15</sup>. Budget need also increased as GDP per capita in adjacent areas  
121 increased and (in the second model) as the relative fisheries catch increased, with the likely  
122 mechanism being that cost increase as pressure on the MPAs increases. Finally, budget  
123 need went down as the level of tourism increased. This was different from a result found in  
124 Australian MPAs<sup>7</sup> where costs rose with visitor numbers. We hypothesise that the difference  
125 is due to the fact that our dataset contained many developing countries, where lower  
126 economic capacity and shortfalls in funding and staff can lead to some private tourism  
127 operators taking on many of the *de facto* management roles, reducing the perceived cost to  
128 state as the likelihood of tourism increases<sup>19</sup>.  
129

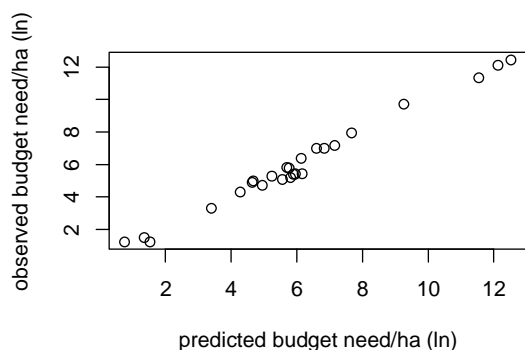

130  
131 **Figure 1. Comparing observed data on MPA budget need per hectare against the predictions of the**  
132 **statistical model.**

133  
134 **Table 1. Statistical models predicting the optimal budget per hectare for a national MPA system.** Budget  
135 need was input at purchasing power parity and ln-transformed. All predictor variables were z-standardized.  
136 Values indicate the model coefficients. See supplementary material for similar results using a different estimator

137 software. The regression model was a mixed effects generalized linear model with negative binomial errors, a log  
138 link and a random intercept term for region.  
139

|         | Intercept | National system size in km <sup>2</sup> . (ln) | Mean GDP per capita in areas surrounding the MPA system. (ln + 1) | International arrivals per capita of domestic population. | Mean fisheries catch in areas surrounding MPA relative to mean in whole EEZ | AICc   |
|---------|-----------|------------------------------------------------|-------------------------------------------------------------------|-----------------------------------------------------------|-----------------------------------------------------------------------------|--------|
| Model 1 | 6.20      | -2.18                                          | 1.21                                                              | -0.57                                                     | -                                                                           | 294.35 |
| Model 2 | 5.91      | -2.14                                          | 1.36                                                              | -0.66                                                     | 0.71                                                                        | 302.10 |

140

141

142 With a regression model in hand, the standard next step is to apply the model to predict  
143 costs of a larger PA system<sup>8,15</sup>. However, a system expanded to 30% coverage is likely to  
144 include a much larger proportion of offshore areas (e.g. beyond the 12 nautical mile limit)  
145 than the current MPA systems on which the model was parameterised. Offshore MPAs  
146 mostly require management of large industrial vessels that have remote tracking systems for  
147 monitoring and control<sup>20</sup>, presenting a very different cost context from inshore MPAs that can  
148 require intensive management of numerous small fishing vessels and other users. We  
149 therefore developed a further, novel costing model for offshore MPAs, based on observed  
150 costs of remote tracking and long-distance patrol vessels (Methods).

151

#### 152 **Creating scenarios to allow costing of draft policy goals**

153 MPA management costs depend on MPA location and governance arrangements but for  
154 policy proposals such as 30x30, neither of those has yet been decided at the moment of  
155 initial policy debate. To generate a rapid estimate of costs in the absence of such  
156 information, we created three 30x30 scenarios, rooted in biodiversity need but representing  
157 a range of political options about the strictness of protection (Methods, Supplementary  
158 Material). Since existing commitments to 30x30 largely interpret the target as 30% coverage  
159 for each country, we used that interpretation in our scenarios. Scenario 1 assumes that all  
160 MPAs in each country are no-take (i.e. no fishing); scenario 2 makes 50% of each country's  
161 MPA area no-take and the other 50% mixed-use (i.e. some sustainable fishing is allowed);  
162 and scenario 3 uses the 50% mixed-use rule inshore (where small scale fishers operate) but  
163 assumes no-take rules in all MPAs offshore (where industrial fleets principally operate).

164

165 For each scenario, we divided each national system into an inshore component and an  
166 offshore one, varying the definition of these two areas to bracket a range of costs (Methods).  
167 To estimate management costs, we applied the predictive regression model to the inshore  
168 component and the offshore costing model to the offshore component. To estimate  
169 establishment costs, we took a recent model of cost per MPA creation<sup>21</sup> and multiplied this  
170 cost by the likely number of new MPAs in each EEZ (Methods). We aggregate our estimates  
171 of all costs by World Bank income group because our intention is to give a broad sense of  
172 likely budget needs, rather than controversially suggesting that a budget is appropriate for  
173 any particular country before its government has even debated or chosen how to implement  
174 the GBF. The management cost estimates for high-income countries are less certain  
175 (Methods) so we report values for developing (non-high-income) countries separately, and  
176 then extend these to global values by adding the less certain estimate for high-income  
177 countries.

178

179 We found that the total annual finance needed to manage a 30x30 MPA system was \$1.9-  
180 \$4.5 billion for developing countries and \$7.9-\$14.4 billion globally (table 2). The average  
181 (median) cost per country ranged from \$0.5-\$0.7 million/yr for low income countries, to \$2.0-  
182 \$4.4 million/yr for lower-middle income countries, and up to \$74.4-\$120.1 million/yr in high  
183 income countries (figure 2, supplementary table 4). Our mixed-use approach (scenario 2)

184 was considerably more expensive than a 100% no-take system (scenario 1). For example,  
 185 scenario 2 was more expensive than scenario 1 by a factor of 2.4 in low income countries  
 186 and 8.2 in lower-middle income countries. Establishment costs were much lower: the total  
 187 additional budget needed would be \$2.91 million for low-to-middle income countries (or  
 188 \$12.6 million if amortized at 5% over 30 years) and \$5.7 million globally (or \$24 million if  
 189 amortized at 5% over 30 years) (table 3). This is equivalent to a mean annual payment over  
 190 30 years of \$21,232 per country for low-to-middle income countries (or \$91,764 at 5%  
 191 interest) and \$32,732 per country globally (or \$141,465 at 5% interest). We caution that the  
 192 global figures may be underestimated because some high income countries may have  
 193 unusually large establishment costs<sup>22</sup>.

194  
 195  
 196  
 197  
 198  
 199

**Table 2. Total estimated annual management cost to expand to 30% MPA coverage.** Values show sum of costs for all countries in each World Bank income group, in millions of U.S. dollars (constant 2015 values) and using the mean of the 12 cost estimates for each country. scen = scenario,

| Income Group              | total cost (\$ millions) |         |         |
|---------------------------|--------------------------|---------|---------|
|                           | scen. 1                  | scen. 2 | scen. 3 |
| Low                       | 13.6                     | 32.1    | 22.0    |
| Lower-middle              | 156.9                    | 1285.9  | 257.6   |
| Upper-middle              | 1758.1                   | 3185.9  | 3161.9  |
| High                      | 6003.7                   | 9855.8  | 8848.1  |
| All low-and middle-income | 1928.6                   | 4503.9  | 3441.5  |
| .                         |                          |         |         |
| Global                    | 7932.3                   | 14359.7 | 12289.5 |

200  
 201  
 202

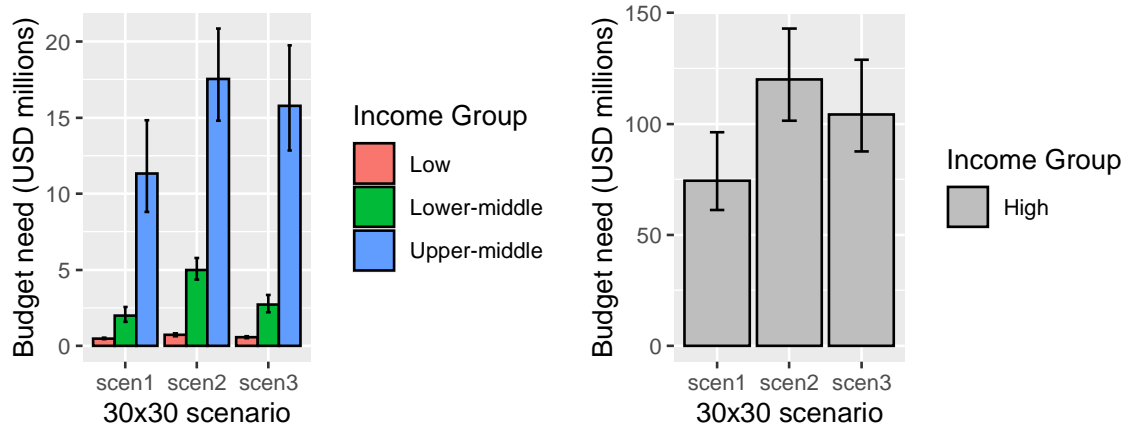

203  
 204  
 205  
 206  
 207  
 208

**Figure 2. Median annual management costs of MPA system with 30% coverage, under different scenarios.** Results show the median cost per country in each income group; error bars show the minimum and maximum for any country in that group (see Methods). Values are in constant 2015 US dollars.

209  
210  
211

212 **Table 3. Annualized establishment cost to expand to 30%, by World Bank income country group.** Values  
213 are in millions of constant 2015 US dollars and show the median, 25th and 75th percentile for each income  
214 group; scen = scenario, min = minimum, max = maximum. Amortization calculations assume 5% annual interest  
215 on repayments over 30 years.

| Income Group | median cost | 25th %ile | 75th %ile |
|--------------|-------------|-----------|-----------|
|              | scen. 1     | scen. 1   | scen. 2   |
| Low          | 0.004       | 0.003     | 0.077     |
| Lower-middle | 0.084       | 0.004     | 0.124     |
| Upper-middle | 0.110       | 0.026     | 0.164     |
| High         | 0.010       | 0.006     | 0.242     |

216  
217  
218  
219

### ***Projected impact on fisheries***

220 To project possible opportunity costs, we input our three MPA scenarios as spatial areas of  
221 total or partial fishing restriction into two MEMs (BOATS and EcoOcean<sup>23-25</sup>), which estimate  
222 fish abundance from oceanic net primary production and sea surface temperature, then  
223 simulate future fishing effort, catch and value as a function of fish abundance and economic  
224 parameters. We defined the economic impact as the difference between each 30x30  
225 scenario and a reference baseline of no further MPA expansion (in terms of both catch  
226 weight and catch financial value). The models calculated this impact yearly from 2025 (the  
227 first year of creation of new MPAs in the model) until 2100, under three alternative Marine  
228 Socioeconomic Pathways (MSPs): MSP1, MSP3 and MSP5. Each MSP made different  
229 assumptions about the severity of future climate change (the representative concentration  
230 pathway or RCP), the sustainability of future fisheries management practices and the joint  
231 impact of these on fish stocks and fishing patterns. MSP1 assumed RCP2.6 (i.e. very limited  
232 global warming) and a reduction of effort; MSP3 assumed RCP7.0 (higher global warming)  
233 and a steady increase in effort; and MSP5 assumed RCP8.5 (very high global warming) and  
234 unchanging effort (supplementary table 1 and 2). The two MEMs implemented "sustainable  
235 fishing" in mixed-use MPAs in different ways: BOATS reduced overall fishing intensity to  
236 sustainable levels for all fishers, whereas EcoOcean interpreted sustainability as permitting  
237 SSFs to fish freely, banning industrial fleets. For details, see Supplementary Material.

238  
239  
240  
241  
242  
243  
244  
245  
246  
247  
248

We report opportunity costs for MSP3 in the main text and for other MSPs in supplementary figures 1 & 2. For MSP3 in BOATS, catch values declined in all scenarios in the years immediately following 30x30 implementation, then started to recover. In scenarios 1 and 3, both of which have large proportions of no-take MPA, catch values remained below the reference baseline until the end of the century (figure 3). However, in scenario 2, which allows some sustainable fishing in MPAs, catch values after ~2040 rose to levels higher than the reference baseline. This economic benefit to fishers corroborates other studies that suggest that MPAs may promote fisheries stock recoveries (which could be exploited directly in mixed-use areas)<sup>11,26</sup>. Future work will incorporate estimates of the stock spillover that is observed to occur in a <200m strip along the border of fully no-take MPAs<sup>26</sup>, a phenomenon

249 not currently modelled by the MEMs. Opportunity costs may therefore be overestimated  
250 (although a 200m MPA-system border represents a very small fraction of total fishing area).  
251 Changing the assumptions about future fishing effort and climate change (in MSP1 and  
252 MSP5) did not affect this broad pattern but did alter the size of the projected changes  
253 (Supplementary Material).

254  
255 Since EcoOcean effectively banned industrial fleets from all MPAs in all scenarios (varying  
256 the level of permitted access for SSFs only), the industry-wide impact for all scenarios was  
257 similar to the no-take scenario 1 for BOATS. We therefore used EcoOcean to study the  
258 specific impact on SSFs. This was highly variable, with some countries seeing SSF catch  
259 losses and others catch gains (Supplementary Material). The most likely mechanism  
260 explaining the gains is reduced competition with industrial fisheries, along with the same  
261 stock recoveries as before. Countries experiencing SSF gains included those where fishing  
262 was an important economic activity, such as many Pacific, Indian Ocean and Caribbean  
263 islands. However, there was not a clear economic difference between countries that gained  
264 and countries that lost catch.

265  
266

267  
268

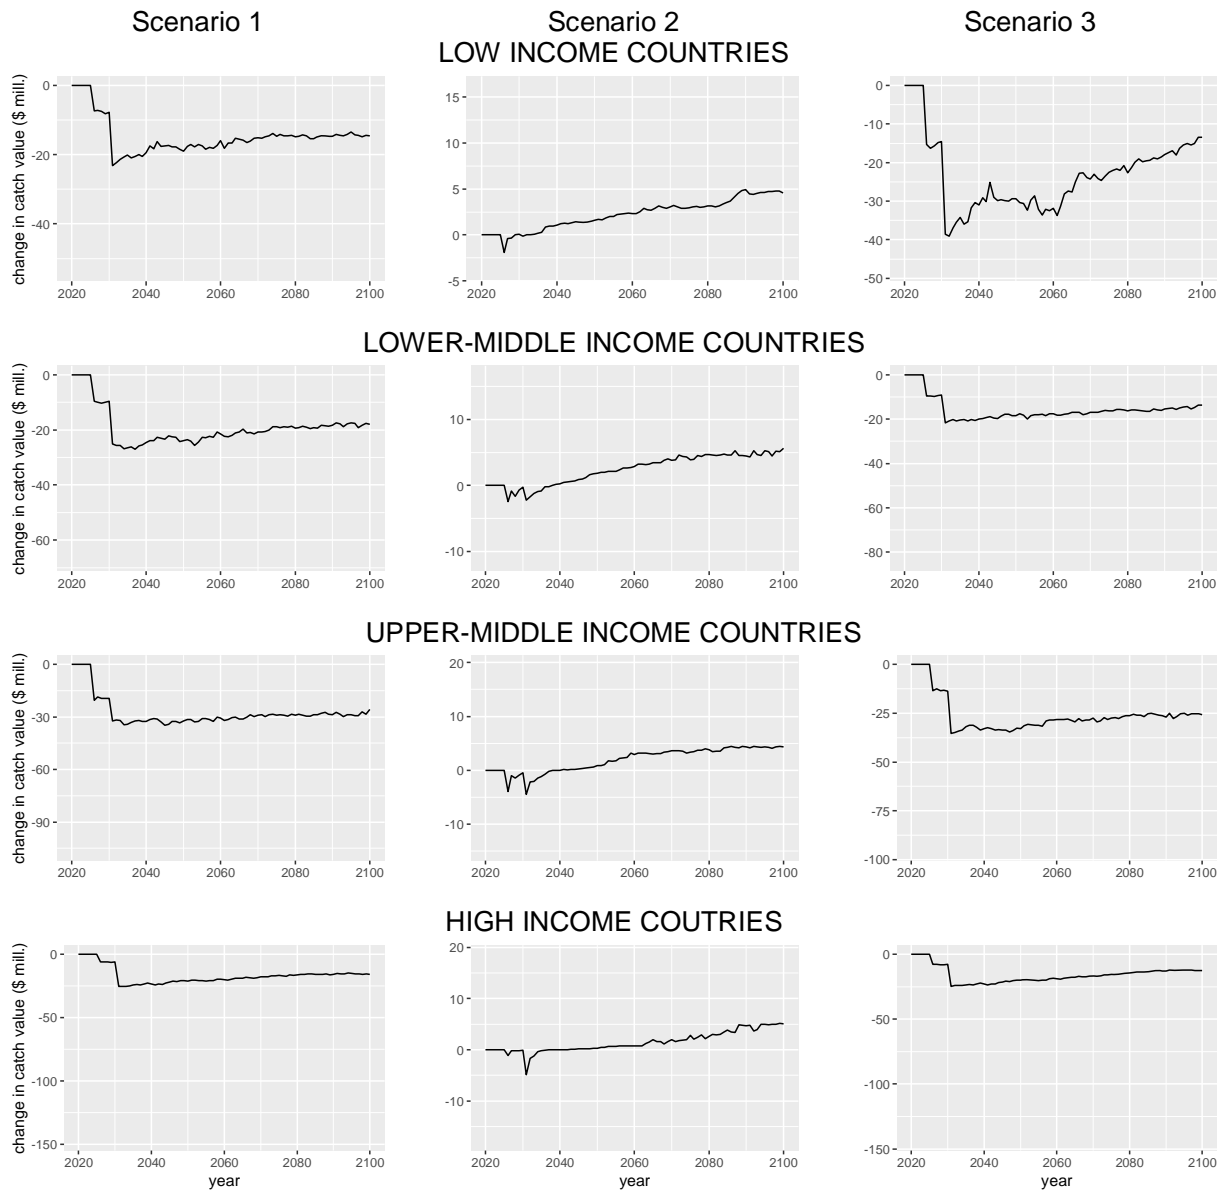

269  
270  
271  
272  
273  
274  
275

**Figure 3. Projected change in the value of fisheries catches (relative to the reference baseline) under the mid-range marine socioeconomic pathway (MSP370).** Line shows the median and shaded area shows the interquartile range of projected opportunity costs for countries in each income group. Note the different scales for the different scenarios. Values are in constant 2015 US dollars.

276 ***Implications for the financing of MPA expansion (30x30)***

277 The managers of existing PAs already report that the funding they receive is insufficient to  
278 achieve their basic goals, with 50% shortfalls often reported<sup>27,28</sup>. Implementing the 30x30  
279 target, without committing the finance to make it the MPAs effective, would result in a  
280 lose/lose situation. Conservation costs would go up, yet without meaningfully reducing  
281 biodiversity loss. Our study helps avoid this eventuality in two ways. First, it shows what the  
282 actual PA budget need is likely to be, so that governments can commit to the goal in full  
283 knowledge of the likely (approximate) cost. Second, it shows that the cost for MPA  
284 management is particularly modest: for example, the annual cost estimate for the entire



285 developing world is \$1.9-\$4.6 billion per year (management and amortised (at 5%)  
286 establishment costs combined). Seen from this perspective (of direct costs only), a marine  
287 30x30 seems highly feasible, especially if it receives some international support.  
288

289 However, our study shows that in the marine context, the major cost can actually be the  
290 opportunity cost (corroborating Brander et al<sup>18</sup>). If unaddressed, these large marine  
291 opportunity costs would risk 30x30 being unimplementable politically and practically<sup>29</sup>. MPA  
292 creation could be seen as particularly unjust because the government and international  
293 community is paying such a modest cost, and yet the hidden (opportunity) cost to local users  
294 - many of whom may be economically vulnerable - would be several times larger (a similar  
295 situation is faced by non-landowners who derive their livelihoods from terrestrial areas that  
296 become PAs). This negative impact will become even more important as the blue economy  
297 rows rapidly in size<sup>30</sup>.

298  
299 Two contrasting approaches could address opportunity-cost issues. The first to allow  
300 exploitation of some parts of each national MPA system. Fishing currently occurs in 94% of  
301 MPAs<sup>31</sup>, a very high incidence that undermines marine biodiversity conservation<sup>31</sup>. Any  
302 example of a more balanced compromise than 94%, bringing reasonably positive outcomes  
303 for both fishers and conservation, may encourage decision-makers to implement greater  
304 strictness of protection in future. Although it was not our aim to define any "best  
305 compromise", it is encouraging that our main compromise scenario (scenario 2) generated a  
306 small economic benefit for fishers, while giving full no-take protection to 50% of the MPA  
307 system and constraining fishing strongly in the other 50%. Detailed local planning of MPA  
308 zones could allow positive fisheries outcomes at even higher no-take percentages<sup>29,32</sup>.

309  
310 The second approach is to accept a biological need for a fully protected (no-take) system  
311 and offer some form of financial mitigation to those suffering opportunity costs. In the  
312 extreme, a financial mitigation approach could be used with a 100% no-take MPA system  
313 that maximises biodiversity benefit (our scenario 1). Our results show that in that case, the  
314 annual mitigation spending needed may be several times larger than the management costs.  
315 For example, the median foregone catch value for a low or lower-middle income country is  
316 approximately \$20-30 million per year for scenarios 1 and 3, whereas the corresponding  
317 management costs are only \$0.5-\$2 million (figure 3, supplementary  
318 3). Economic losses do not necessarily need exact compensation but some form of  
319 mitigation, whether from subsidy, livelihood support and retraining, or other mechanism, is  
320 likely to be required for MPA expansion to be politically acceptable. The broader implication  
321 is that when costing marine PAs, it is particularly important to consider both direct costs and  
322 opportunity costs in a broader budget-need estimate.  
323

324 More generally, our results emphasise that cost approaches honed on a largely terrestrial  
325 PA estate are misleading for a marine context. On land, PA costing models generally include  
326 the cost of purchasing new conservation land from tenure-holders<sup>29</sup>. That purchase cost is  
327 generally high (approximately 50 times the annual management cost<sup>33</sup>) because purchase  
328 prices must compensate the tenure-holder for the future stream of income that s/he would  
329 expect otherwise<sup>9,33</sup>. In other words, the establishment cost incorporates much of the  
330 opportunity cost and allocates it to conservation authorities (such as the environment  
331 ministry). The oceans are a commons, and so ocean-users affected by MPA creation lack  
332 this tenure-based compensation. The lack of compensation for marine users has a  
333 particularly severe impact because new MPAs can easily be created on existing fishing  
334 grounds, making the loss of income immediate. New terrestrial PAs, on the other hand,  
335 would more often target unexploited land, so protection there does not imply an immediate,  
336 widespread loss of production.  
337

338 If MPA implementation is to be just and politically feasible, marine conservation managers  
339 may need to bestow on the commons a set of economic rights similar to those enjoyed by

340 tenure-holders of targeted conservation land. Including some form of financial support in the  
341 estimate of marine budget needs also has an element of social-justice logic: with MPAs,  
342 governments are essentially saved from paying very large establishment costs, precisely  
343 because there is no marine framework for compensating tenure-holders for lost income. We  
344 do not mean to suggest that governments should add up support and management costs  
345 and simply choose the cheapest option. Nor do we recommend any of our scenarios in  
346 particular, noting simply that they represent different approaches to trade offs that sovereign  
347 governments and their rights-holders and stakeholders must decide between. However, our  
348 models can give a broad sense, in advance of any decisions made, of what the likely  
349 economic consequences are. Some mixture of financial mitigation approaches and  
350 permitted-fishing approaches in MPAs may eventually be needed, depending on local  
351 conditions and biodiversity needs.

352  
353 In conclusion, the management costs, opportunity costs and biodiversity benefits of MPAs  
354 all trade off against each other. A highly protected system of 30% MPAs would require very  
355 modest MPA managements budgets, but any savings could be dwarfed by the size of the  
356 financial support needed. Allowing some fishing in MPAs can greatly reduce opportunity  
357 costs (and therefore financial support needs) and even boost fisheries incomes, but at the  
358 cost of higher management budgets and reduced biodiversity protection. Mitigating the  
359 opportunity costs, while making protection stricter, is an alternative that respects the  
360 particular economic reality of the ocean economy: that fishers, as users of a commons, can  
361 suffer immediate income losses after MPA creation, yet without enjoying the right to  
362 compensation that owners of land enjoy. At a time when rights-based approaches to  
363 conservation have come to emphasise the importance and justice of PA impacts on non-  
364 landowners<sup>34</sup>, a logical extension is that users of the marine commons should be granted the  
365 same consideration.

366  
367

368  
369  
370  
371  
372  
373  
374  
375  
376  
377  
378  
379  
380  
381  
382  
383  
384  
385  
386  
387  
388  
389  
390  
391  
392  
393

## Supplementary Material

### Methods

To generate a costing algorithm for national MPA systems, we first collected data on the empirical budget needs of existing systems (n=30, indicating the difficulty and rarity of estimating optimal budgets), where “budget need” refers to the budget that should be allocated if the system is to achieve its objectives, not the current (often inadequate) budget. Following several previous authors<sup>8,14,15</sup>, we chose to analyse the budget need per hectare. Data on budget needs came from a variety of literature sources but most represent the estimate of a high-level, usually governmental agency of the finance needs of an entire system or in a few instances, a major subsystem within the national system. Many of the sources are confidential, due to the sensitivity of government financial data, and so are available upon considered request and subject to a confidentiality agreement. Budget need is often assessed at two levels of adequacy: "basic" (the minimum budget needed to maintain core management activities adequately) and "optimal" (the estimated cost of managers fully achieving the protected areas' goals)<sup>14,35</sup>. Sources reporting budget needs reported optimal rather than basic needs more often, and so we analysed optimal needs.

To create a costing algorithm that could predict finance needs in both no-data countries and for expanded MPA systems, we first aimed to identify a statistical model that could predict the empirical data with a high level of accuracy. We compiled a set of variables that are theoretically expected to influence finance needs for MPA systems. These variables are listed in supplementary table 1.

| Variable                                                        | Theoretical link to financing need per hectare                                                                                         | Summary details where applicable (see text for full details)                                                                                                                                                                                                                                                                                                                                                              |
|-----------------------------------------------------------------|----------------------------------------------------------------------------------------------------------------------------------------|---------------------------------------------------------------------------------------------------------------------------------------------------------------------------------------------------------------------------------------------------------------------------------------------------------------------------------------------------------------------------------------------------------------------------|
| Size of the MPA system                                          | reflecting economy of scale <sup>7,8,14,15</sup>                                                                                       | Size data was generally included with confidential empirical data on finance needs; any gaps were filled using the World Database on Protected Areas ( <a href="http://www.protectedplanet.net">www.protectedplanet.net</a> )                                                                                                                                                                                             |
| GDP per capita PPP in areas adjacent to the MPA system          | reflecting both economic activity around MPAs, which might imply a need for enforcement, and national differences in operational costs | Two versions; (i) measured in a 25km buffer around all MPAs in each national system (taking the national mean); (ii) measured simply in a 50km wide coastal strip for the country with the MPAs, using spatial layers for 2015 from Kummur et al. <sup>36</sup> (because 2015 was the mean year in which finance need data was reported).                                                                                 |
| Relative fisheries catch in waters immediately adjacent to MPAs | an MPA system set in high-value fishing grounds is likely to require more active enforcement.                                          | We further theorised that what was important in a national context was not simply the catch near MPAs, but how this compared to the catch in other national fishing grounds. We therefore used mean catch in the 25km buffer surrounding MPAs divided by mean catch in same-sized areas throughout the EEZ. Catch data (tonnes) were extracted by R. Watson from databases described in references 38-39 <sup>37,38</sup> |
| The age of the                                                  | New systems may                                                                                                                        | Mean MPA age per country was extracted                                                                                                                                                                                                                                                                                                                                                                                    |

|                                                                               |                                                                                                                                                                                                                                                                                                                                               |                                                                                                                                                                                                                                                                                                                                                                                    |
|-------------------------------------------------------------------------------|-----------------------------------------------------------------------------------------------------------------------------------------------------------------------------------------------------------------------------------------------------------------------------------------------------------------------------------------------|------------------------------------------------------------------------------------------------------------------------------------------------------------------------------------------------------------------------------------------------------------------------------------------------------------------------------------------------------------------------------------|
| system                                                                        | need additional funding (implying a positive expectation) or may not yet have established full funding (implying a negative expectation)                                                                                                                                                                                                      | from the World Database on Protected Areas ( <a href="http://www.protectedplanet.net">www.protectedplanet.net</a> ) for the year 2015 (because 2015 was the mean year in which finance need data was reported)                                                                                                                                                                     |
| The density of the human population along coastal areas facing the MPA system | Higher density could imply more need for enforcement, or more spending on visitor facilities. Both effects would increase the finance need.                                                                                                                                                                                                   | Human population density layers for 2015 were extracted from Gridded Population of the World v4 <sup>39</sup> , then mean population in a 5km strip opposite each MPA was extracted, and the mean per national MPA system calculated.                                                                                                                                              |
| The mean distance offshore of the MPAs in the system                          | More distant MPAs may imply higher patrol costs, but may also imply some reduction in the number of people who can reach the MPA (which could reduce patrol needs and costs)                                                                                                                                                                  | Shortest distance from each MPA to the coast of the country owning the MPA, using the sf package in R <sup>40</sup>                                                                                                                                                                                                                                                                |
| The level of tourism                                                          | Tourism may imply the need for more infrastructure and people control, increasing costs <sup>7,14</sup> , but it may also reduce the costs to MPA managers if tourist enterprises themselves meet some of those costs, or if they act as deterrents to unsanctioned activities and motivate a pro-nature culture in the region around the MPA | Few finance need reports included estimates of MPA tourism and such data is notoriously hard to collect. We therefore created a proxy by using the number of international arrivals divided by the population. International arrivals came from World Bank data for 2015 <sup>41</sup> and population was taken for 2015 from the Gridded Population of the World v4 <sup>39</sup> |

394  
395  
396  
397  
398  
399  
400  
401  
402  
403  
404  
405  
406  
407

GDP and population size in coastal areas near MPAs is often calculated by buffering out MPAs to a fixed distance and then analysing GDP or population inside the buffer. However, using a fixed buffer size can create a situation where a nearshore MPA has a buffer that stretches far inland, whereas a further-offshore MPA has a buffer that only just touches a few metres of coast (and can also cause distance offshore and the buffer values to interact non-randomly). We preferred to have the buffer reach the same distance inland in all cases and then create an independent distance variable, and so we created customised buffers for the MPA system by adding 5km to the offshore distance (essentially creating a 5km strip of coastal land opposite each MPA). We then extracted data on GDP/capita PPP<sup>36</sup> and human population size and density<sup>39</sup> for 2015. However, we did follow the logic of previous authors by capping the buffer size at a maximum of 50km, firstly because we were using a different costing algorithm for MPAs that are far offshore (see Offshore Costs), and secondly to

408 reflect an intuition that the impact of coastal populations would dwindle to a low level in  
409 MPAs that are far offshore.

410  
411 For St Kitts and Nevis, calculating the GDP in a set of coastal strips opposite the MPA  
412 system produced NAs in spatial analysis. The calculation itself is also an onerous step if the  
413 costing method is to be used to cost future MPA expansion proposals. We therefore tested  
414 whether GDP per capita for each country's 50km coastal strip was a reasonable proxy of  
415 GDP per capita in the customised buffers. We found that the simpler measure (the 50km  
416 coastal strip) was an accurate predictor of the more complex one (R-squared = 0.912) but  
417 also tended to overestimate the buffer-based result, for the clear reason that a buffer  
418 contains a seaward side in which there is no nearby coast and GDP is therefore zero,  
419 reducing the mean value in a way that does not occur if one only measures the coastal strip  
420 values. We therefore adjusted coastal GDP by applying the regression relationship between  
421 itself and the empirical data on buffer GDP (which has the effect of reducing the coastal  
422 strip-based GDP value).

423  
424 For all variables except system size (which was extracted at national scale), we calculated  
425 national values as the mean of the values for all individual MPAs in a national system. All  
426 predictor variables were z-standardised prior to regression analysis and natural log  
427 transformations were applied to the system extent and to GDP.

428  
429 Due to the hollow-curve, non-negative frequency distribution of our finance-need data, our  
430 regression analysis used mixed generalized linear models with a negative binomial error  
431 structure, a log link and a random effect for region (via the intercept), using two different  
432 fitting packages in the R software environment: lme4 (with the glmer.nb command)<sup>42</sup> and  
433 glmMadaptive<sup>43</sup>. We used an information theoretic approach to select best-fitting model or  
434 models, ranking by delta AICc (Akaike Information Criterion corrected for sample size)<sup>44</sup>.  
435 Since information theoretic approaches select the best model from those provided by the  
436 researcher but are mute as to the explanatory power of the terms included, we also  
437 extracted p values from the best fitting regression models and checked whether  $p < 0.05$ .  
438 Finally, as a measure of goodness of fit for a mixed negative binomial model (where R-  
439 squared values are not naturally estimable), we calculated and plotted the correlation  
440 between the predicted and observed values (figure 1). Diagnostic plots for regression  
441 analysis were also examined and these suggested no problems with the best-fitting models  
442 selected.

443  
444 Empirically, MPA systems at the time of the budget-need reports tended to be predominantly  
445 placed in inshore waters and rarely occurred in far-offshore parts of the EEZ (e.g. in our  
446 data, a mean of 47% of the total MPA area lay inside the 12 nautical mile limit and thus  
447 inside only 11% of the EEZ). By implication, any costing model parameterised upon that  
448 data is best suited to predicting costs for more inshore areas. However, expansion of MPA  
449 coverage to 30% of the EEZ is likely to create several new protected zones that are  
450 considerably further offshore (for example, our 30x30 scenarios (below) suggested a median  
451 of 77% of the MPA area would be outside the 12 nautical mile limit). This creates a problem  
452 of applicability for the regression model because management of an offshore area differs  
453 notably from management of an inshore area, implying that offshore areas could also have  
454 very different costs. Specifically, offshore areas are likely to be mostly under threat from  
455 large industrial actors such as industrial fishing boats. Industrial fleets that can be in distant  
456 parts of the EEZ are most efficiently controlled by a combination of long-distance patrol  
457 vessels and remote monitoring technologies<sup>20,45</sup>, which combine tracking of ship courses,  
458 independently checked onboard CCTV cameras and sensors that detect fishing gear use (  
459 see also Waldron in preparation). Nearer the shore, actors such as small-scale fishers and  
460 tourists require more intensive management and their vessels often lack the onboard  
461 technology that would allow remote monitoring.

462

463 We therefore decided to split the costing estimate into two parts: an inshore component and  
464 an offshore component. The inshore component was estimated using the regression model.  
465 For the offshore component, we reviewed the management cost data from very large MPAs  
466 and supplemented it with data from some large offshore fishing grounds that required  
467 enforcement (Waldron in preparation). We extracted the size of the industrial fleets operating  
468 in each EEZ from Tidd et al.<sup>46</sup> and calculated the combined cost of installing and  
469 administering remote sensing, remote monitoring via onboard cameras for that fishing fleet  
470 (with recordings independently verified by a paid professional), plus a patrol fleet similar to  
471 that used in fisheries and very large MPA enforcement to date (a range of three possible  
472 values assuming either one boat per 500,000km<sup>2</sup>, per 400,000km<sup>2</sup> and 600,000km<sup>2</sup>).

473

#### 474 *Model Results and Application*

475 One of the principal difficulties of costing a proposed target (such as 30x30) is that the  
476 costing must be done in advance of any specific information. Intuitively, the costs are likely  
477 to depend strongly on the spatial distribution and protection regimes of any future MPAs,  
478 and yet at the moment of policy creation, none of these details have been decided. One  
479 solution to this paradox is to take a set of scenarios of how the policy might reasonably be  
480 implemented and analyze each one. In this way, a range of costs can be estimated, which  
481 are assumed to be likely to bracket the eventual cost. Any estimated cost using this method  
482 cannot therefore be fully accurate, nor is it intended to be. Instead, the goal is to provide a  
483 range of likely costs and economic impacts, and to illustrate likely trade offs.

484

485 With this goal in mind, we created three scenarios for 30x30, plus a reference scenario of no  
486 further expansion of MPAs (i.e. MPAs remain static at their 2021 extent and strictness of  
487 protection). All scenarios begin from the current (2021) extent of MPAs (downloaded from  
488 the World Database of Protected Areas, [www.protectedplanet.net](http://www.protectedplanet.net)), and then expand the  
489 system in each country to achieve 30% coverage of the EEZ. We divided the EEZ up into  
490 1km squared cells and identified all cells already protected. Expanding from that baseline  
491 requires a ranking system and for this cell ranking, we used the raster map of marine  
492 biodiversity conservation priorities from Sala et al.<sup>11</sup>. The Sala et al. ranking system uses  
493 equal-area cells of approximately 3000km<sup>2</sup>, so we downscaled the original rasters to the  
494 1km resolution and clipped to the borders of the EEZ. (Spatial EEZ outlines were taken from  
495 the World EEZ v11 product at [marineregions.org](http://marineregions.org)). We then added 1km cells to the existing  
496 MPA system in order of their cell values. If, in the last iteration of this addition process, the  
497 cropped 3000km<sup>2</sup> cell with the next highest value produced more 1km cells than were  
498 needed to achieve 30% coverage, we chose to preserve contiguity (since such a practicality  
499 was likely to reflect political and operational realities), by adding the 1km cells contiguously  
500 in a west-east direction until the 30% target was reached.

501

502 The basic spatial layer of cells extracted so far had no definition of the strictness of  
503 protection or access rules implied. Since part of our interest lay in the direct costs and  
504 opportunity costs associated with different compromises between biodiversity and fisheries  
505 livelihoods, we created three scenarios on the basis of the basic layer, differentiating  
506 between scenarios by varying the fishing effort permitted in different parts of the EEZ.  
507 Specifically, the scenarios were created to explore the differences in all costs between a  
508 biodiversity focused system that was 100% no-take; a system that allowed compromise  
509 between biodiversity protection and all fishers, including both industrial and near-shore/small  
510 scale ones; and systems that compromised in ways that would protect small-scale and near-  
511 shore fishers' livelihoods but excluded large industrial fishing vessels from protected areas  
512 (to the nearest spatial approximation. For simplicity, we defined the fishing access permitted  
513 in the different scenarios by defining two protection levels, using a simplified structure similar  
514 to current categories of protection<sup>47</sup>. "High protection" areas were modelled to exclude  
515 fishing exploitation (similar to Horta e Costa et al.'s Fully Protected Area category<sup>47</sup>), and  
516 "medium protection" areas were modelled to allow a low/sustainable level of fishing carried  
517 out (similar to Moderately Protected in the same source). In BOATS, sustainable fishing in

518 MPAs is defined as follows, irrespective of whether the fisher is industrial or small-scale: If  
519 fish populations are overfished in 2014, sustainable fishing is the effective effort level in  
520 1974. If there was no fishing in 1974, sustainable fishing is half of the effective effort in 2014.  
521 If fish populations are not overfished by 2014, sustainable fishing is the effective effort in  
522 2014. If there was no fishing in 2014, fishing is left unregulated. In EcoOcean, sustainable  
523 fishing definitions focused instead on often-vulnerable small-scale fishers (SSFs) and simply  
524 defined medium protection as allowing fishing by SSFs but not by industrial vessels. For  
525 management cost model, medium protection was defined following Ban et al<sup>7</sup>, where it is the  
526 simple difference between no-take and "not no-take" that drives management cost  
527 differences.

528  
529 We then divided the selected MPA cells in each scenario into an inshore component and an  
530 offshore component for each EEZ. To avoid arbitrariness in the choice of where these two  
531 components occur in marine space, we created four separate definitions of the limit line  
532 between inshore and offshore. The first inshore/offshore limit line was based on the mean of  
533 the empirical MPA area contained inside the 12 nautical mile limit (47%, which we converted  
534 to a limit line at 2.12 times the 12 nautical mile limit). We also modelled a limit line sitting  
535 exactly on the 12nm limit (generating the smallest inshore extent); one lying 1.55 times  
536 12nm offshore (based on the 66.67th percentile of the empirical distribution of the  
537 percentage MPA area inside the 12nm), creating the second smallest inshore area; and one  
538 lying 50 nautical miles offshore (a point at which small scale fishers are likely to be reduced  
539 to very low frequency<sup>48</sup>), where this last definition created the largest inshore area. These  
540 different limit-line definitions essentially represent a management decision about how far  
541 offshore it is worth continuing to apply (more expensive) inshore approaches. For example,  
542 the further offshore one goes, the fewer small actors are likely to be present (due to  
543 differences in feasible sailing distances and engine power). There will therefore be a point (a  
544 distance) offshore at which the managing agency decides it is no longer worth using  
545 intensive inshore management techniques and switches to more at-a-distance offshore  
546 techniques. We acknowledge that it may sometimes be possible to apply both intensive and  
547 at-a-distance techniques. However, simultaneous application of both approaches is unlikely  
548 to change the cost estimates materially because small inshore vessels generally do not  
549 carry the technology that allows them to be tracked and any larger vessels that do move  
550 close to shore will already have had their tracking costs factored in as part of the offshore  
551 model.

552  
553 To translate different scenarios into spatial rasters for analysis, we divided the base 30x30  
554 layer of selected cells up so that in each scenario, a different pattern of protection levels  
555 applied across the national system as a whole, without needing to make any assumptions  
556 about protection mosaics in each individual MPA but respecting the broader difference  
557 between inshore and offshore areas. Our range of approaches for protection levels was  
558 designed to explore trade-offs between the demands of national fishers, coastal livelihoods  
559 and conservation priorities (supplementary table 2). Thus, scenario 1 assumes no-take for  
560 the entire national MPA system, including those already existing; scenario 2 splits the  
561 national system 50:50 between medium and high protection; and scenario 3 has a more  
562 complex arrangement in which the compromise of medium protection applies only in the  
563 inshore areas where SSFs are likely to operate (supplementary table 2). For the Reference  
564 Scenario (MPAs already in existence), we defined high protection as all current MPAs  
565 classed as Fully/Highly Protected in Sala et al.<sup>11</sup> (op. cit.), and medium protection as all  
566 other current MPAs. (We acknowledge that some current MPAs have insufficient protection  
567 to be classed as "medium protection" (for example, they may still be unsustainably fished),  
568 and this is often associated with very large funding shortfalls for their management<sup>27</sup>. The  
569 reference scenario itself should therefore be regarded as an ambition for the future, in which  
570 all current MPAs are fully funded and can achieve at least a sustainable level of exploitation  
571 (medium protection) and where desired, high protection.)

572

573 **Supplementary Table 2. Scenarios used to create a range of illustrative costs for 30%**  
 574 **MPA protection**

| Scenario                                    | Description                                                                                                                                                                                                                                                                                                                                                                                                 |
|---------------------------------------------|-------------------------------------------------------------------------------------------------------------------------------------------------------------------------------------------------------------------------------------------------------------------------------------------------------------------------------------------------------------------------------------------------------------|
| Reference Scenario (extent of current MPAs) | Assumes no future MPA growth beyond what is currently in place. However, existing MPAs are modelled to receive the fully adequate level of funding. Existing MPAs that are not Fully Highly Protected are all modelled to achieve medium protection (sustainable exploitation). Existing Fully Highly Protected MPAs retain high protection status.                                                         |
| Scenario 1 (30% of EEZ)                     | Very stringent conservation: all 1km cells are given high protection, including upgrading of existing MPAs that are not Fully Highly Protected                                                                                                                                                                                                                                                              |
| Scenario 2 (30% of EEZ)                     | Full trade-off between fisheries and conservation. Both inshore and offshore, 50% of the expanded MPA area is modelled as high protection and 50% as medium protection (preserving classification of existing MPAs). NB in one of our Ocean Ecosystem Models (EcoOcean), high protection still allows artisanal fishing.                                                                                    |
| Scenario 3 (30% of EEZ)                     | Partial trade-off between fisheries and conservation. Inshore, 50% of the expanded MPA area is modelled as high protection and 50% as medium protection (with existing MPAs preserving their current classification). Offshore, all 1km MPA cells are modelled to have high protection, excepting that any existing offshore MPAs that are not Fully Highly Protected retain their existing classification. |

575

576

577 To apply the predictive regression model and extract inshore costs, we created a new  
 578 dataset of system sizes for the 30% scenarios, breaking down the size into the inshore  
 579 extent and the offshore extent and using the inshore extent only as the input to the model for  
 580 prediction. This was done four times to capture the four alternative spatial definitions of  
 581 inshore/offshore area that we had created earlier. We also calculated the area of each  
 582 inshore and offshore area, in each EEZ, that would receive high and medium protection  
 583 respectively. For the GDP per capita term, we input GDP per capita PPP in the 50km coastal  
 584 strip of each country. For relative catch, it was difficult to robustly project the likely future  
 585 catch in the areas around new MPAs post-2030 and how catches in other parts of the EEZ  
 586 (i.e. not associated with MPAs) would change, so we simply applied a range of possible  
 587 multipliers of the current relative catch and used them to sensitivity-test the outputs of the  
 588 costing model (supplementary results). We did not attempt to forecast changes in the future  
 589 ratio of international arrivals to domestic population, taking the simplifying assumption that it  
 590 would remain constant.

591

592 To account for offshore management costs, we calculated the cost of one long-range patrol  
 593 boat per 500,000km<sup>2</sup> (varied to 400,000 and 600,000 to give a range of values) and the



594 REM need (including satellite and radar costs, administrative costs and the costs of  
595 monitoring onboard video recordings) for all industrial fishing vessels in the EEZ, assuming  
596 that when MPAs occupy 30% of a country's ocean, often in remote parts of the EEZ, then  
597 the entire fleet should be tracked and monitored. We therefore assumed that offshore areas  
598 would be fished by large vessels and took the number of large vessels in each EEZ from  
599 Tidd et al.<sup>46</sup>. Future vessel numbers may vary but given the small impact this variation would  
600 have on the overall cost, we again took a simplifying assumption that they remained at the  
601 same level observed in the empirical data.

602  
603 We further adjusted the predicted management cost of the inshore component to capture  
604 differences in cost between high and medium protection. To allow a range of uncertainty  
605 around this cost differential, we used three different estimates based on Ban et al.'s  
606 analyses<sup>7</sup>, in which experts and statistical models both suggested cost savings if operating a  
607 system with 100% no-take rather than a mixed system with 30% no-take. Experts suggested  
608 20-year management costs would be 1.69 times higher for the mixed system and models  
609 suggested 1.96 times (with other values also possible). We therefore assumed, as our three  
610 alternative adjustments, that high-protection MPA systems would need annual management  
611 budgets that were, respectively, 51% ( $=1/1.96$ ), 54.7% ( $=1/(1.96+1.69/2)$ ) and 59.2%  
612 ( $=1.1.69$ ) of the budget needs for medium protection systems. (We note that Balmford et  
613 al.'s MPA cost model<sup>15</sup> did not include a significant effect for no take/extractive use allowed,  
614 whereas Ban et al. reports that both experts and a statistical analysis concurred that no-take  
615 MPAs have lower management costs). For the offshore component, we assumed that due to  
616 the remoteness and large distances involved, similar vessel tracking and patrol boat  
617 capacity would be needed across the range of access rules.

618  
619 *Establishment costs*

620 Establishment costs are those costs associated with the initial creation of a new MPA. Two  
621 studies have extracted known costs and sought models to explain them: McCrear-Strub et  
622 al.<sup>22</sup> found data from 13 MPAs across 6 countries and found the costs to be related to MPA  
623 size and the duration of the creation phase, with the size relationship strongly driven by the  
624 difference between a cluster of very small MPAs (largely in the Philippines) and three very  
625 large MPAs, two of which were in the USA. Binet et al.<sup>21</sup> found data from 23 MPAs across 10  
626 countries and found the cost to be independent of size. When attempting to model the  
627 creation costs for an entire national system which has not yet been designed, the McCrear-  
628 Strub model obliges the researcher to assume the size of each new MPA in the unknown  
629 system, presenting the same problem as occurs when trying to apply the Balmford model for  
630 individual MPA management costs to predict the cost of an entire unknown system. Since  
631 the Binet model is size-independent and based on a larger sample, we used that for the  
632 present study. The Binet model does require an estimate of the number of MPAs in the  
633 system. To derive this number, we first assumed that the inshore part of the expanded  
634 system would be divided into multiple MPAs but the offshore part would be patrolled by a  
635 single long-range vessel assisted by remote monitoring, making it essentially a single unit.  
636 We then extracted the number and extent of inshore MPAs in all current national systems  
637 (using the 12nm definition of "inshore"), calculated the statistical relationship between  
638 number and extent of MPAs in existing data for 2019 ([www.protectedplanet.net](http://www.protectedplanet.net)) and used  
639 that statistical model to estimate the number of MPAs expected in the inshore component of  
640 the 30x30 scenarios, rounding to the nearest integer then adding one for the assumed  
641 offshore unit. This calculation generated a mean of 15 new MPAs and a maximum of 81 new  
642 MPAs per EEZ.

643  
644 *Opportunity costs*

645 The principal opportunity cost studied in MPAs is typically the possible loss of fishing  
646 revenues (foregone catch value)<sup>18</sup> and we focus on that cost here. (We do not look at  
647 foregone mining and extractive activities). We projected fisheries opportunity cost by  
648 interpreting MPAs as a set of restrictions on fishing activity (again varying the amount of

649 MPA that had medium protection and allowed some sustainable fishing) and then using  
650 MEMs (Marine Ecosystem Models) to project the likely changes in catch value that result.  
651 We used two MEMs (BOATS<sup>24,25</sup> and EcoOcean<sup>23,49</sup>), since each model represent the many  
652 complexities of marine ecosystem functioning in different ways. BOATS was used to extract  
653 aggregate economic projections but does not disaggregate by Small Scale Fisheries (SSF)  
654 and Industrial Fisheries. We quantified the opportunity cost from BOATS as the difference  
655 between the projected value of the catch under each scenario (in each year) and the  
656 projected value of the catch under the reference scenario. EcoOcean does estimate SSF  
657 outcomes separately but given the uncertainties involved in estimating the precise dollar  
658 values of catch across a large number of small craft with limited record-keeping and the fact  
659 that some SSF catch effort may be intended for personal consumption rather than market  
660 sale, we quantified the SSF opportunity cost as projected percentage changes in catch  
661 between the 30x30 scenarios and the reference scenario.

662  
663 The MEM outcomes also depend on assumptions about the level of ambition (and success)  
664 in future sustainability goals affecting the ocean economy more broadly, particularly with  
665 respect to fisheries management and climate change (RCPs or representative concentration  
666 pathways). To reflect this range of possibilities, three sub-versions of each opportunity cost  
667 projection were generated, each based on a different marine socioeconomic pathway  
668 (MSP), which describes a combination of a shared socio-economic pathway (SSP) to model  
669 trajectories in the sustainability of fisheries management (interpreted for the ocean system  
670 by Maury et al.<sup>50</sup>), plus a representative concentration pathway (RCP) to show an associated  
671 level of sustainability in climate change mitigation:

672 1. MSP1 = SSP1+ RCP2.6

673 Fishing effort is steered back to sustainable levels thanks to strong management  
674 and long-term considerations. The effort in 1974 is defined as the sustainable  
675 baseline, and in projections effort should return to 1974's levels by 2050. In  
676 EcoOcean: nominal effort changes. In BOATS: effective effort changes.

677 2. MSP3 = SSP3 + RCP7.0

678 Fishing effort increases due to poor management and short-term priorities, but  
679 rate of technological progress is low. Rate of nominal effort increase is 1% yr<sup>-1</sup>,  
680 based on Rousseau et al. In both models, nominal effort changes.

681 3. MSP5 = SSP5+ RCP8.5

682 Fishing effort is diversely affected by decreases in demand, poor management  
683 and high technological progress. This complex development is implemented by  
684 fixing effort at the 2015 levels. In EcoOcean, nominal effort is fixed. In BOATS,  
685 effective effort is fixed.

686

687 The complete set of model runs, accounting for both scenario differences and  
688 SSP/climate forcing options is shown in supplementary table 3.

689

690 **Supplementary Table 3: List of scenario runs for the Ocean Ecosystem Models**

691

| Index | Scenario  | SSP | FORCING | Run name     |
|-------|-----------|-----|---------|--------------|
| 1     | Reference | 1   | RCP2.6  | S0ssp1rcp2.6 |
| 2     | Reference | 3   | RCP7.0  | S0ssp3rcp7.0 |
| 3     | Reference | 5   | RCP8.5  | S0ssp5rcp8.5 |
| 4     | 1         | 1   | RCP2.6  | S1ssp1rcp2.6 |
| 5     | 1         | 3   | RCP7.0  | S1ssp3rcp7.0 |
| 6     | 1         | 5   | RCP8.5  | S1ssp5rcp8.5 |
| 7     | 2         | 1   | RCP2.6  | S2ssp1rcp2.6 |
| 8     | 2         | 3   | RCP7.0  | S2ssp3rcp7.0 |
| 9     | 2         | 5   | RCP8.5  | S2ssp5rcp8.5 |
| 10    | 3         | 1   | RCP2.6  | S3ssp1rcp2.6 |

|    |   |   |        |              |
|----|---|---|--------|--------------|
| 11 | 3 | 3 | RCP7.0 | S3ssp3rcp7.0 |
| 12 | 3 | 5 | RCP4.5 | S3ssp5rcp8.5 |

692  
693  
694  
695  
696  
697  
698  
699  
700  
701  
702  
703  
704  
705  
706  
707  
708  
709  
710  
711  
712

MEMs were run at a resolution of one degree on a latitude-longitude grid of the oceans. Scenario designs were therefore upscaled from 1km to one degree, with parallel grid inputs showing the proportion of high protection and the proportion of medium protection in each one-degree cell. We note that this has the advantage of not imposing exact locations on the MPAs, in keeping with the need for sovereign countries in consultation with key stakeholders and rightsholders to retain control and flexibility in the final location of any MPAs. To reflect the time taken to create expanded MPA systems and the way that implementation of that goal is likely to be staggered in time, the expansion was implemented in the MEMs in two parts: half of the new MPA area was modelled as coming into existence in 2025 (by random draw), and the remainder in 2030 by linear interpolation.

As output, the MEMs projected the following economic outcomes at five-year intervals from 2020 to 2100: catch (mass), catch (value), catch per unit effort, and net catch value (profit). Five-year values were calculated as the average of the preceding five years. Overall, the two MEM model outputs (for BOATS and EcoOcean) were therefore harmonized to the highest degree possible.

713 *Supplementary Results*

714

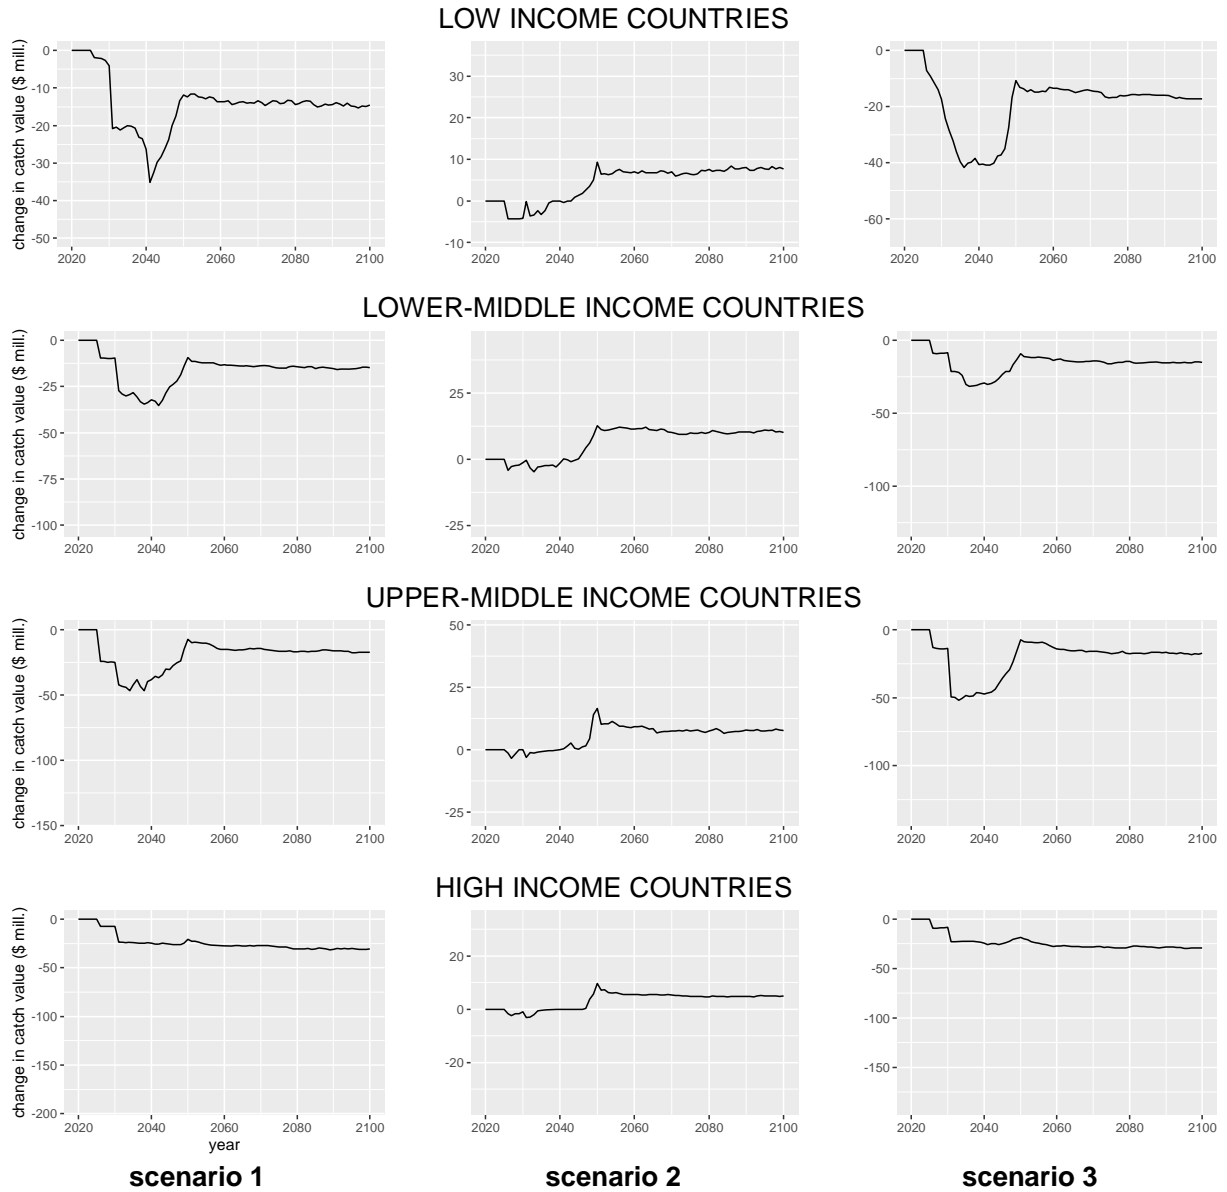

715

716

717

718

719

720

**Supplementary Figure 1. Projected change in the value of fisheries catches (relative to the reference baseline) for MSP 126.** Line shows the median and shaded area shows the interquartile range for each income group and each scenario. Note the different scales for the different scenarios. Values are in constant 2015 US dollars.

721  
722  
723

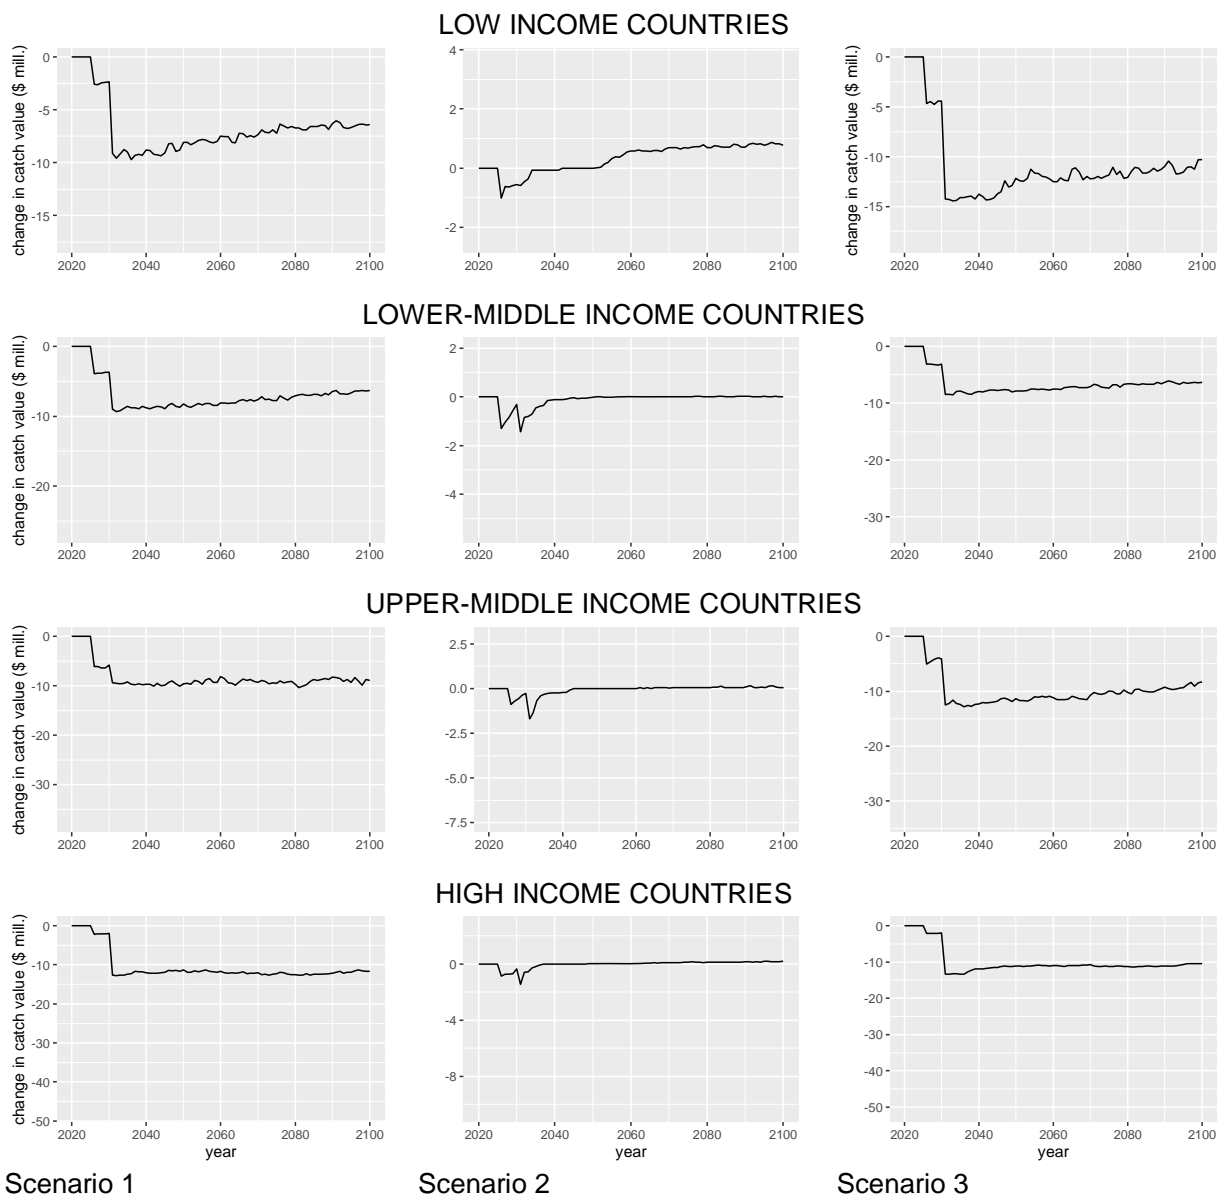

724 **Supplementary Figure 2. Projected change in the value of fisheries catches (relative**  
725 **to the reference baseline) under MSP585.** Line shows the median and shaded area shows  
726 the interquartile range for each income group and each scenario. Note the different scales  
727 for the different scenarios. Values are in constant 2015 US dollars.  
728  
729  
730

731

732

733

734

735

736

**Supplementary Table 4. Median annual management cost per country of expanding to 30%, aggregated by World Bank income group.** scen = scenario, \$m = millions of U.S. dollars, min = minimum value for the lowest country in the group, max = maximum value for the highest country in the group

| Income Group             | median cost (\$m), mean of 12 approaches |         |         |         | min. across approaches (\$m) |         | max. across approaches (\$m) |         |         |
|--------------------------|------------------------------------------|---------|---------|---------|------------------------------|---------|------------------------------|---------|---------|
|                          | scen. 1                                  | scen. 2 | scen. 3 | scen. 1 | scen. 2                      | scen. 3 | scen. 1                      | scen. 2 | scen. 3 |
| Low<br>(n=12)            | 0.48                                     | 0.72    | 0.58    | 0.44    | 0.64                         | 0.52    | 0.54                         | 0.83    | 0.63    |
| Lower-middle<br>(n=39)   | 1.99                                     | 4.98    | 2.70    | 1.59    | 4.37                         | 2.22    | 2.55                         | 5.79    | 3.34    |
| Upper-middle<br>(n = 43) | 11.33                                    | 17.55   | 15.77   | 8.81    | 14.79                        | 12.84   | 14.82                        | 20.86   | 19.76   |
| High<br>(n = 46)         | 74.33                                    | 120.05  | 104.26  | 61.24   | 101.42                       | 87.61   | 96.17                        | 142.93  | 128.94  |

737

738

739

740 **References**

741

- 742 1. Marine Conservation Institute. MPA Atlas. [www.mpatlas.org](http://www.mpatlas.org).
- 743 2. O'Leary, B. C. *et al.* Effective Coverage Targets for Ocean Protection. *Conserv. Lett.* **9**,  
744 398–404 (2016).
- 745 3. CBD. Zero Draft of post-2020 biodiversity framework. *Secr. Conv. Biol. Divers.* (2020).
- 746 4. Mitchell, R. B. International Environmental Agreements: A Survey of Their Features ,  
747 Formation, and Effects. *Annu. Rev. Environ. Resour.* **28**, 429–61 (2003).
- 748 5. Matz, N. Environmental Financing<sup>2</sup>: Function and Coherence of Financial Mechanisms  
749 in International Environmental Agreements '. *Max Planck Yearb. United Nations Law*  
750 **6**, 473–534 (2002).
- 751 6. Gupta, J., Vegelin, C. & Pouw, N. Lessons learnt from international environmental  
752 agreements for the Stockholm + 50 Conference<sup>2</sup>: celebrating 20 Years of INEA  
753 Convention on Biological Diversity. *Int. Environ. Agreements Polit. Law Econ.* **22**, 229–  
754 244 (2022).
- 755 7. Ban, N. C., Adams, V., Pressey, R. L. & Hicks, J. Promise and problems for estimating  
756 management costs of marine protected areas. *Conserv. Lett.* **4**, 241–252 (2011).
- 757 8. Bruner, A. G., Gullison, R. E. & Balmford, A. Financial Costs and Shortfalls of Managing  
758 and Expanding Protected-Area Systems in Developing Countries. *Bioscience* **54**, 1119–  
759 1126 (2004).
- 760 9. Hussain, S. *et al.* *The Economics of Ecosystems and Biodiversity Quantitative*  
761 *Assessment. Final report to UNEP.* (2011).
- 762 10. Naidoo, R. *et al.* Integrating economic costs into conservation planning. **21**, 681–687  
763 (2006).
- 764 11. Sala, E. *et al.* Protecting the global ocean for biodiversity, food and climate. *Nature*  
765 **592**, 397–402 (2021).
- 766 12. Balmford, A. *et al.* Ecology: Economic reasons for conserving wild nature. *Science (80-*  
767 *).* **297**, 950–953 (2002).
- 768 13. Waldron, A. & *et al.* *Protecting 30% of the planet for nature: costs, benefits and*  
769 *economic implications.*  
770 [https://www.conservation.cam.ac.uk/files/waldron\\_report\\_30\\_by\\_30\\_publish.pdf](https://www.conservation.cam.ac.uk/files/waldron_report_30_by_30_publish.pdf)  
771 (2020).
- 772 14. Gravestock, P., Roberts, C. M. & Bailey, A. The income requirements of marine  
773 protected areas. *Ocean Coast. Manag.* **51**, 272–283 (2008).
- 774 15. Balmford, A., Gravestock, P., Hockley, N., McClean, C. J. & Roberts, C. M. The  
775 worldwide costs of marine protected areas. *Proc. Natl. Acad. Sci. U. S. A.* **101**, 9694–  
776 9697 (2004).
- 777 16. Wilson, K. A. *et al.* Conserving biodiversity in production landscapes Conserving  
778 biodiversity in production landscapes. *Ecol. Appl.* **20**, 1721–1732 (2014).
- 779 17. Kolding, J., Béné, C. & Bavinck, M. Small-scale fisheries: Importance, vulnerability and  
780 deficient knowledge. in *Governance of Marine Fisheries and Biodiversity*  
781 *Conservation: Interaction and Co-evolution* (eds. Garcia, S., J. R. & Charles, A.) 317–  
782 331 (Wiley-Blackwell, 2014). doi:10.1002/9781118392607.ch22.
- 783 18. Brander, L. M. *et al.* The global costs and benefits of expanding Marine Protected  
784 Areas. *Mar. Policy* **116**, 103953 (2020).
- 785 19. Colwell, S. Entrepreneurial marine protected areas: Small-scale, commercially  
786 supported coral reef protected areas. in *Coral Reefs: Challenges and Opportunities for*

- 787            *Sustainable Management* (eds. Hatzioolos, M., Hooten, A. & Fodor, M.) 110–114  
788            (1997).
- 789    20.    McCauley, D. J. *et al.* Ending hide and seek at sea. *Science* (80-. ). **351**, 1148–1150  
790            (2016).
- 791    21.    Binet, T., Diazabakana, A. & Hernandez, S. *Sustainable financing of Marine Protected*  
792            *Areas in the Mediterranean: a financial analysis*. (2015) doi:10.1787/9789264276208-  
793            7-en.
- 794    22.    Mccrea-Strub, A. *et al.* Understanding the cost of establishing marine protected  
795            areas. *Mar. Policy* **35**, 1–9 (2011).
- 796    23.    Coll, M. *et al.* Advancing global ecological modelling capabilities to simulate future  
797            trajectories of change in marine ecosystems. *Front. Mar. Sci.* **Submitted**, (2020).
- 798    24.    Carozza, D. A., Bianchi, D. & Galbraith, E. D. Formulation, general features and global  
799            calibration of a bioenergetically-constrained fishery model. *PLoS One* **12**, 1–28 (2017).
- 800    25.    Carozza, D. A., Bianchi, D. & Galbraith, E. D. The ecological module of BOATS-1.0: A  
801            bioenergetically constrained model of marine upper trophic levels suitable for studies  
802            of fisheries and ocean biogeochemistry. *Geosci. Model Dev.* **9**, 1545–1565 (2016).
- 803    26.    Di Lorenzo, M., Guidetti, P., Di Franco, A., Calò, A. & Claudet, J. Assessing spillover  
804            from marine protected areas and its drivers: A meta-analytical approach. *Fish Fish.*  
805            **21**, 906–915 (2020).
- 806    27.    Gill, D. A. *et al.* Capacity shortfalls hinder the performance of marine protected areas  
807            globally. *Nature* **543**, 665–669 (2017).
- 808    28.    Besancon, C., Marcus, T., Bohorquez, J. & Meyers, D. *Protected Area Finance Capacity*  
809            *Needs: Results of a Global Survey Conservation Finance Alliance and Global Park*  
810            *Solutions*. (2021).
- 811    29.    Halpern, B. S., Klein, C. J., Brown, C. J., Beger, M. & Grantham, H. S. Achieving the  
812            triple bottom line in the face of inherent trade-offs among social equity , economic  
813            return , and conservation. *PNAS* **110**, 6229–6234 (2013).
- 814    30.    Jouffray, J.-B., Blasiak, R., Norström, A. V, Österblom, H. & Nyström, M. The Blue  
815            Acceleration: The Trajectory of Human Expansion into the Ocean. *One Earth* **2**, 43–54  
816            (2020).
- 817    31.    Costello, M. J. & Ballantine, B. Biodiversity conservation should focus on no-take  
818            Marine Reserves: 94% of Marine Protected Areas allow fishing. *Trends Ecol. Evol.* **30**,  
819            507–509 (2015).
- 820    32.    Klein, C. J. *et al.* Tradeoffs in marine reserve design: habitat condition, representation,  
821            and socioeconomic costs. *Conserv. Lett.* **6**, 324–332 (2013).
- 822    33.    James, A., Gaston, K. J. & Balmford, A. Can we afford to conserve biodiversity?  
823            *Bioscience* **51**, 43–52 (2001).
- 824    34.    Woodhouse, E. *et al.* Guiding principles for evaluating the impacts of conservation  
825            interventions on human well-being. *Philos. Trans. R. Soc. Lond. B. Biol. Sci.* **370**, 251–  
826            277 (2015).
- 827    35.    Bovarnick, A., Baca, J. F., Galindo, J. & Negret, H. Financial Sustainability of Protected  
828            Areas in Latin America and the Caribbean: Investment Policy Guidance. *Undp* 162  
829            (2010).
- 830    36.    Kummu, M., Taka, M. & Guillaume, J. H. A. Gridded global datasets for Gross  
831            Domestic Product and Human Development Index over 1990–2015. *Sci. Data* **5**,  
832            180004 (2018).
- 833    37.    Watson, R. A. & Tidd, A. Mapping nearly a century and a half of global marine fishing:



- 834 1869–2015. *Mar. Policy* **93**, 171–177 (2018).
- 835 38. Watson, R. A. *et al.* Global marine yield halved as fishing intensity redoubles. *Fish*  
836 *Fish.* **14**, 493–503 (2013).
- 837 39. Center for International Earth Science Information Network - CIESIN. Gridded  
838 Population of the World, Version 4 (GPWv4): Population Density Adjusted to Match  
839 2015 Revision of UN WPP Country Totals. (2016)  
840 doi:<http://dx.doi.org/10.7927/H4HX19NJ>.
- 841 40. Pebesma, E. Simple features for R: standardized support for spatial vector data. *R J.*  
842 **10**, 439–446 (2018).
- 843 41. World Bank. The World Bank Databank. [databank.worldbank.org](http://databank.worldbank.org) (2013).
- 844 42. Bates, D., Mächler, M., Bolker, B. & Walker, S. Fitting Linear Mixed-Effects Models  
845 Using lme4. *J. Stat. Softw.* **67**, 1–48 (2015).
- 846 43. Rizopoulos, D. GLMMadaptive: generalized linear mixed models using adaptive  
847 Gaussian Quadrature. (2022).
- 848 44. Burnham, K. P. & Anderson, D. R. *Model selection and multimodel inference: a*  
849 *practical information-theoretic approach*. (Springer-Verlag, 2002).
- 850 45. Appleby, T. *et al.* Sea of possibilities: Old and new uses of remote sensing data for the  
851 enforcement of the Ascension Island marine protected area. *Mar. Policy* **127**, 103184  
852 (2021).
- 853 46. Tidd, A. N., Rousseau, Y., Ojea, E., Watson, R. A. & Blanchard, J. L. Food security  
854 challenged by declining efficiencies of artisanal fishing fleets: A global country-level  
855 analysis. *Glob. Food Sec.* **32**, 100598 (2022).
- 856 47. Horta, B. *et al.* A regulation-based classification system for Marine Protected Areas  
857 (MPAs). *Mar. Policy* **72**, 192–198 (2016).
- 858 48. Lawrence, T. N. & Bhalla, R. S. Spatially explicit action research for coastal fisheries  
859 management. *PLoS One* **13**, e0199841 (2018).
- 860 49. Christensen, V. *et al.* The global ocean is an ecosystem: simulating marine life and  
861 fisheries. *Glob. Ecol. Biogeogr.* **24**, 507–517 (2015).
- 862 50. Maury, O. *et al.* From shared socio-economic pathways (SSPs) to oceanic system  
863 pathways (OSPs): Building policy-relevant scenarios for global oceanic ecosystems  
864 and fisheries. *Glob. Environ. Chang.* **45**, 203–216 (2017).
- 865
